# Supplementary material for: Mental fatigue impairs time trial performance in sub-elite under 23 cyclists
Source: PLoS One. 2019 Jun 17;14(6):e0218405. doi: 10.1371/journal.pone.0218405 (PMC6576783; doi:10.1371/journal.pone.0218405)
Supplement: S1 File — (XLSX) [file pone.0218405.s001.xlsx]

## Sheet: Sheet 1
			Tension				Depression				Confusion				Vigueur				Anger				Fatigue																		Power
			Stroop		Control		Stroop		Control		Stroop		Control		Stroop		Control		Stroop		Control		Stroop		Control		Mental demand		Physical demand		Temporal demand		Performance		Effort		Frustration		Motivation		Stroop
Subject	VO2max	PPO	Pre	Post	Pre	Post	Pre	Post	Pre	Post	Pre	Post	Pre	Post	Pre	Post	Pre	Post	Pre	Post	Pre	Post	Pre	Post	Pre	Post	Stroop	Control	Stroop	Control	Stroop	Control	Stroop	Control	Stroop	Control	Stroop	Control	Stroop	Control	3 min	6 min	9 min	12 min	15 min	18 min	21 min	24 min	27 min
1	72.7	425	0	0	2	0	0	0	0	0	0	6	3	3	4	2	7	4	0	0	0	0	1	3	0	0	95	70	5	5	50	40	20	25	60	35	60	25	3	3	339.965	280.165	275.588	263.977	259.295	258.223	255.331	254.58	249.871
2	66.5	350	1	2	1	1	0	0	0	0	0	3	0	0	9	8	8	8	0	0	0	0	0	1	1	1	75	5	5	5	55	5	5	5	65	5	15	5	4	4	265.308	297.471	283.313	266.494	252.792	244.581	250.214	243.033	244.123
3	63.9	350	0	0	0	0	0	1	0	0	0	5	1	1	7	0	7	5	0	3	0	2	0	6	1	2	75	50	5	5	50	25	50	50	75	50	50	50	2	3	230.273	249.963	269.599	302.583	302.16	295.434	284.895	261.838	274.193
4	73.2	400	0	0	0	0	0	0	0	0	0	1	1	2	8	5	6	6	0	0	0	0	1	4	1	2	55	40	20	20	100	65	20	25	85	40	50	30	3	3	304.772	313.148	314.678	319.367	317.661	319.025	319.664	313.196	326.117
5	61.6	325	2	3	1	1	0	0	0	0	0	5	0	2	9	8	9	8	0	0	0	0	2	4	3	3	75	35	25	15	85	45	20	40	80	40	50	10	4	4	199.805	218.053	215.662	215.115	231.857	263.966	280.242	298.162	302.745
6	70	350	0	1	0	0	0	0	0	0	0	4	0	2	10	9	10	10	0	0	0	0	0	0	0	1	45	10	15	5	85	10	15	15	80	5	40	40	3	3	261.115	290.534	303.252	299.696	280.526	279.429	274.485	267.499	265.771
7	65	450	1	1	1	2	1	1	0	0	4	1	1	0	8	6	8	8	1	0	0	0	1	4	1	1	65	35	10	15	65	35	40	25	85	35	50	30	4	4	304.539	311.395	308.393	302.35	315.294	310.395	307.393	305.249	302.395
8	73.7	400	3	3	4	0	0	0	0	0	0	4	2	4	5	4	6	6	1	0	0	0	0	3	0	1	70	40	30	15	65	50	25	15	70	25	50	15	3	2	288.646	308.504	309.93	289.944	284.378	280.042	263.092	263.625	283.451
9	71.5	375	2	1	0	2	0	0	0	0	3	0	1	1	7	5	9	9	0	0	1	1	0	2	2	2	55	30	5	10	70	40	35	30	75	40	55	30	5	5	317.24	316.329	319.394	309.395	312.35	314.093	312.024	316.393	318.303
10	72.2	375	1	1	1	2	1	0	1	1	5	0	2	1	7	5	4	3	0	0	1	0	0	3	2	2	65	20	5	15	80	30	20	20	90	50	40	10	4	4	279.039	278.239	291.039	267.303	269.395	275.394	294.392	285.498	279.32
[truncated: 85 more columns]
