# Supplementary material for: Mental fatigue impairs time trial performance in sub-elite under 23 cyclists
Source: PLoS One. 2019 Jun 17;14(6):e0218405. doi: 10.1371/journal.pone.0218405 (PMC6576783; doi:10.1371/journal.pone.0218405)
Supplement: S2 File — (XLSX) [file pone.0218405.s002.xlsx]

## Sheet: Sheet 1
Subject	Overall accuracy	Overall RT	Acc 1	Acc 2	Acc 3	Acc 4	Acc 5	Acc 6	RT 1	RT 2	RT 3	RT 4	RT 5	RT 6	HR Stroop	HR Control
1	0.947917	1154.54	0.926606	0.919643	0.955357	0.966102	0.963303	0.955357	1237.4	1150.19	1126.33	1037.76	1193.3	1191.75	67	65
2	0.891892	1520.03	0.822917	0.873786	0.876289	0.89899	0.917526	0.96	1615.33	1377.53	1542.44	1509.33	1564.24	1521.3	71	65
3	0.97619	849.46	0.967213	0.97619	0.984127	0.976744	0.984496	0.967742	931.992	856.31	854.302	789.822	791.194	879.04	45	43
4	0.908873	1154.54	0.932692	0.933333	0.912621	0.913462	0.895238	0.865385	1214.4	1230.19	1246.57	1341.63	1199.79	1236.96	45	48
5	0.961864	1020.15	0.945455	0.99115	0.983471	0.967213	0.918033	0.966667	1217.33	1111.42	950.612	911.402	934.828	1020.91	51	50
6	0.976562	1294.37	0.952381	0.969072	0.982301	0.982301	0.982301	0.983333	2070.31	1550.96	1132.6	1106.27	1133.02	1025.18	42	43
7	0.980994	1291.46	0.979094	0.983282	0.962323	0.993284	0.974234	0.95731	956.367	1257.67	1069.74	1363.93	1455.87	1597.66	45	47
8	0.982895	845.234	1	0.97561	0.992063	0.944882	0.984733	1	1003.14	892.089	840.944	835.63	761.618	755.023	49	51
9	0.950822	1095.71	0.942321	0.950611	0.953834	0.949155	0.950663	0.95731	1299.37	1144.67	1069.74	1052.93	1055.87	1061.66	40	42
10	0.951435	1188.27	0.958374	0.964829	0.942395	0.948374	0.914894	0.967742	931.992	1236.04	1213.55	1136.33	1231.32	1379.94	40	44
